# Supplementary material
Source: Springer Nature journal article supplement (https://www.springermedizin.de/resource/supplementary/12967_2013_1759_MOESM10_ESM.pdf/9575252)
Supplement: MOESM10 [file 9575252]

### hsa-miR-155

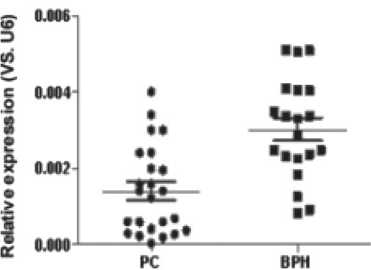

\*\*\*  $p$ -value < 0.0001

### hsa-miR-197

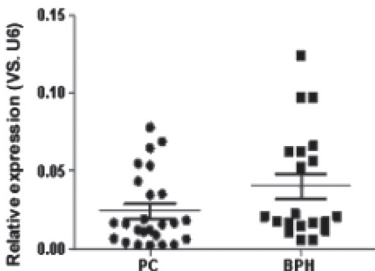

\*  $p$ -value = 0.0767

### hsa-miR-648

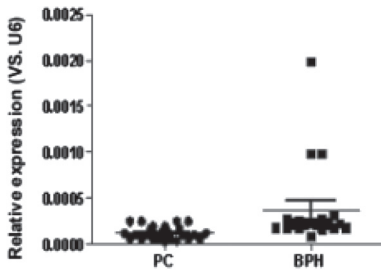

\*\*\*  $p$ -value = 0.0087

\*\*\* Highly significant ( $p$ -value < 0.01)

\*\* Significant ( $0.01 < p$ -value < 0.05)

\* Less Significant ( $p$ -value > 0.05)
